# Supplementary material for: Ammonia-oxidising bacteria not archaea dominate nitrification activity in semi-arid agricultural soil
Source: PubMed Central journal article supplement (PMC4459192; doi:10.1038/srep11146), 2015-06-08

## **Ammonia oxidising bacteria not archaea dominate nitrification activity in semi-arid agricultural soil**

Natasha C. Banning, Linda D. Maccarone, Louise M. Fisk and Daniel V. Murphy\*

Soil Biology and Molecular Ecology Group, School of Earth and Environment, Institute of Agriculture, The University of Western Australia, Crawley, WA 6009, Australia.

\* Corresponding author: [daniel.murphy@uwa.edu.au](mailto:daniel.murphy@uwa.edu.au)

### **Supplementary Information**

**Supplementary Fig. S1.** Abundance of bacterial *16S rRNA* genes (a,f), bacterial *amoA* genes (b,g), archaeal *16S rRNA* genes (c,h) and archaeal *amoA* genes (d,i) in soil cores (0-90 cm depth) from two Western Australian agricultural field trials with treatments + or – organic matter (OM; top row) and + or – lime (bottom row). Treatment effects on soil C (e) and soil pH (j) are shown for the OM and liming trial sites, respectively. Note: gene copy numbers are plotted on a  $\log_{10}$  scale.

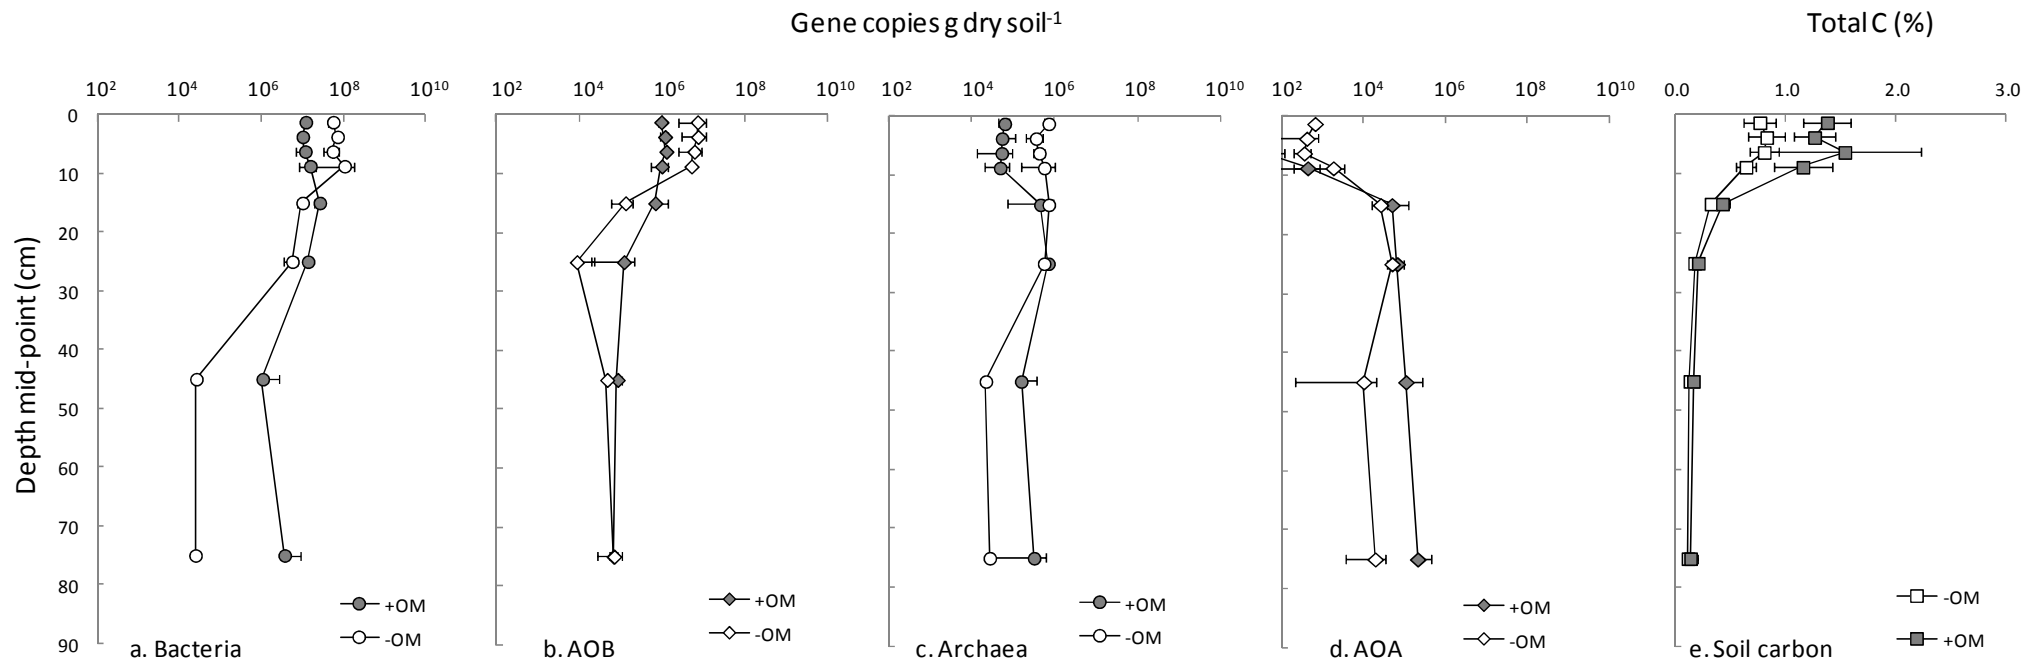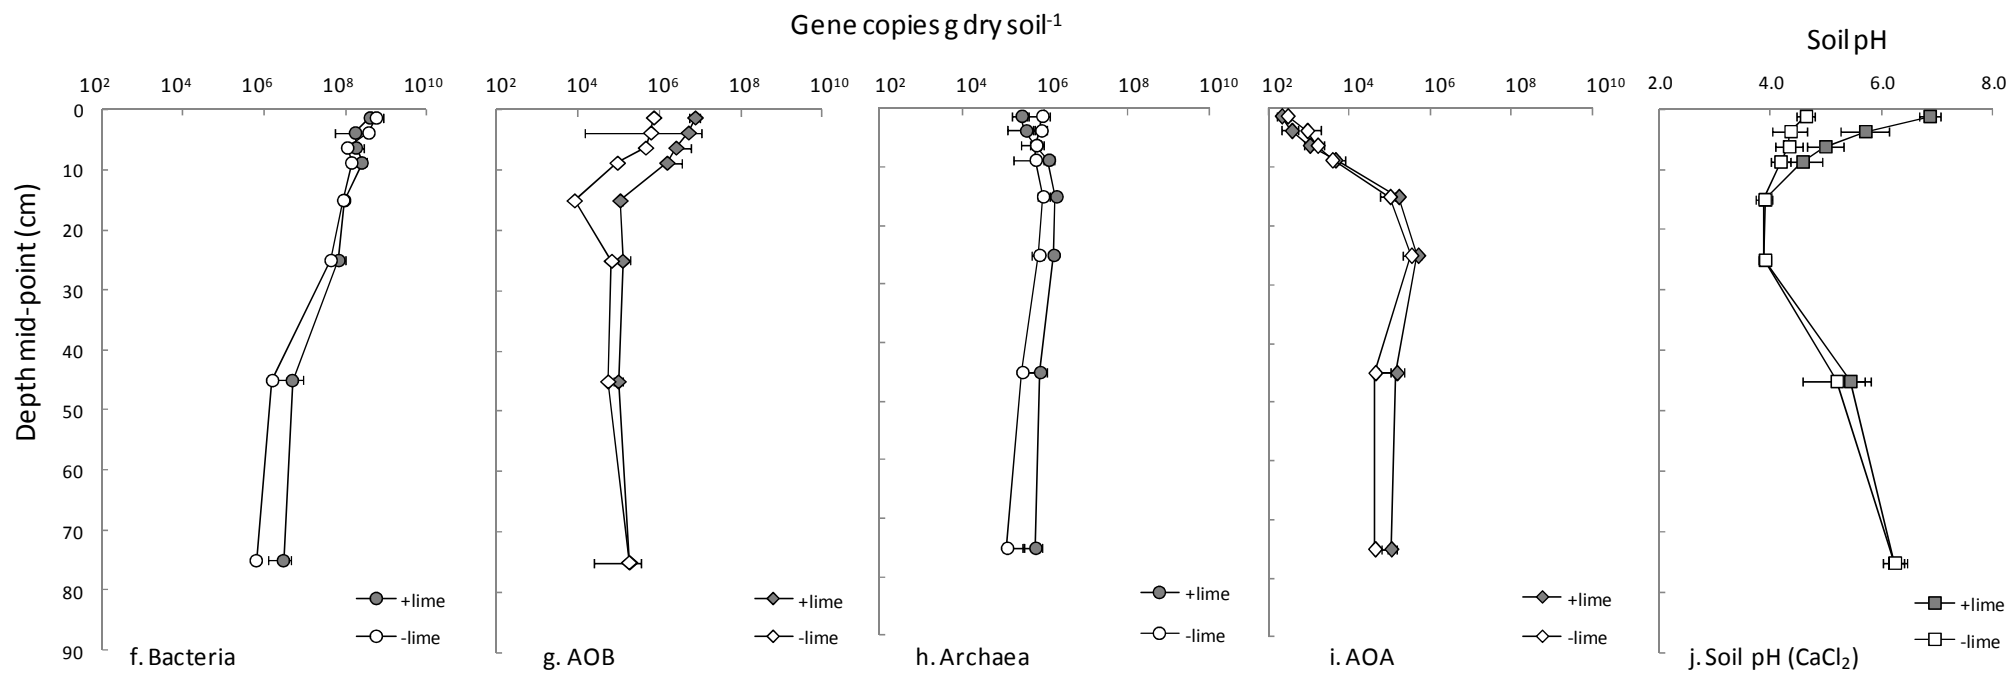

Supplement: srep11146-s1.pdf [file srep11146-s1.pdf]
